# Supplementary material for: Elucidating Functions of FleQ in Xanthomonas oryzae pv. oryzae by Comparative Proteomic and Phenotypic Analyses
Source: MDPI journal article supplement (doi:10.3390/ijms19103038), 2018-10-05
Supplement: s1 [file s1]

**Table S3. Classification of less abundant expressed (>2 fold) protein in Xoo (FleQ) using clusters of orthologous groups from the comparison between Xoo (EV) and Xoo (FleQ)**

| COG function                                                             | Accession | locus tag | Predicted function                                                            | fold change<br>[Xoo (FleQ)/Xoo (EV)] | P-value | included in<br>other group |
|--------------------------------------------------------------------------|-----------|-----------|-------------------------------------------------------------------------------|--------------------------------------|---------|----------------------------|
| C<br>(Energy<br>production and<br>conversion)                            | 188576165 | PXO_00406 | acetoacetyl-CoA reductase                                                     | 0.36                                 | 0.038   |                            |
|                                                                          | 188577544 | PXO_01440 | ketoglutarate semialdehyde dehydrogenase                                      | 0.41                                 | 0.002   |                            |
|                                                                          | 188578691 | PXO_03130 | gloA lactoylglutathione lyase                                                 | *                                    |         |                            |
| E<br>(Amino acid<br>transport and<br>metabolism)                         | 188574714 | PXO_03755 | 5-methyltetrahydropteroyltriglutamate- homocysteine methyltransferase         | 0.42                                 | 0.024   |                            |
|                                                                          | 188574895 | PXO_04017 | bifunctional PutA protein                                                     | 0.43                                 | 0.001   |                            |
|                                                                          | 188575454 | PXO_04559 | asparaginase                                                                  | 0.46                                 | 0.011   |                            |
|                                                                          | 188575529 | PXO_04482 | gcvP glycine dehydrogenase                                                    | 0.49                                 | 0.001   |                            |
|                                                                          | 188576104 | PXO_00463 | glutamine synthetase                                                          | 0.32                                 | 0.010   |                            |
|                                                                          | 188577316 | PXO_01684 | sdaA L-serine ammonia-lyase                                                   | 0.28                                 | 0.011   |                            |
|                                                                          | 188577545 | PXO_01439 | dihydrodipicolinate synthetase                                                | 0.26                                 | 0.000   |                            |
|                                                                          | 188576965 | PXO_06174 | nucleotide sugar transaminase                                                 | *                                    |         |                            |
|                                                                          | 188577543 | PXO_01441 | proline dipeptidase                                                           | *                                    |         |                            |
|                                                                          | 188578147 | PXO_02190 | synthetase/amidase                                                            | *                                    |         |                            |
| F<br>(Nucleotide<br>metabolism)                                          | 188578255 | PXO_02361 | inosine-uridine preferring nucleoside hydrolase                               | 0.32                                 | 0.022   |                            |
|                                                                          | 188575147 | PXO_04267 | cytosine deaminase                                                            | *                                    |         |                            |
| G<br>(Carbohydrate<br>transport and<br>metabolism)                       | 188574381 | PXO_03375 | glgB 1,4-alpha-glucan branching enzyme                                        | 0.37                                 | 0.027   |                            |
|                                                                          | 188574382 | PXO_03374 | treZ malto-oligosyltrehalose trehalohydrolase                                 | 0.27                                 | 0.024   |                            |
|                                                                          | 188574384 | PXO_03372 | treY malto-oligosyltrehalose synthase                                         | 0.42                                 | 0.028   |                            |
|                                                                          | 188574462 | PXO_03668 | alpha-amylase family protein                                                  | 0.42                                 | 0.000   |                            |
|                                                                          | 188574463 | PXO_03667 | alpha-amylase                                                                 | 0.38                                 | 0.007   |                            |
|                                                                          | 188575952 | PXO_00121 | galactonate dehydratase                                                       | 0.43                                 | 0.008   |                            |
|                                                                          | 188578741 | PXO_03080 | L-sorbose dehydrogenase                                                       | 0.40                                 | 0.010   |                            |
|                                                                          | 188577523 | PXO_01470 | hypothetical protein                                                          | *                                    |         |                            |
|                                                                          | 188578082 | PXO_02260 | alpha-N-arabinofuranosidase 2                                                 | *                                    |         |                            |
|                                                                          | 188578931 | PXO_02887 | glycosyl hydrolase, family 15                                                 | *                                    |         |                            |
| H<br>(Coenzyme<br>transport and<br>metabolism)                           | 188575173 | PXO_04293 | nicotinamide phosphoribosyltransferase                                        | 0.39                                 | 0.003   |                            |
|                                                                          | 188575168 | PXO_04288 | lipB lipoyltransferase                                                        | *                                    |         |                            |
|                                                                          | 188578049 | PXO_02141 | adenosyl cobinamide kinase; adenosyl cobinamide phosphate guanylyltransferase | *                                    |         |                            |
| I<br>(Lipid<br>metabolism)                                               | 188574549 | PXO_03577 | cardiolipin synthase                                                          | 0.27                                 | 0.008   |                            |
|                                                                          | 188574667 | PXO_03805 | acyl-CoA dehydrogenase                                                        | 0.48                                 | 0.011   |                            |
|                                                                          | 188575762 | PXO_05532 | enoyl-CoA hydratase/isomerase family protein                                  | 0.20                                 | 0.000   |                            |
|                                                                          | 188578563 | PXO_02706 | 3-oxoacyl-[acyl-carrier-protein] synthase III                                 | 0.43                                 | 0.000   |                            |
|                                                                          | 188575774 | PXO_05537 | ispH 4-hydroxy-3-methylbut-2-enyl diphosphate reductase                       | *                                    |         |                            |
|                                                                          | 188576967 | PXO_06176 | 3-oxoacyl-ACP synthase                                                        | *                                    |         |                            |
|                                                                          | 188577189 | PXO_01811 | PHB depolymerase                                                              | *                                    |         |                            |
| J<br>(Translation)                                                       | 188575692 | PXO_04827 | ribosomal large subunit pseudouridine synthase F                              | *                                    |         |                            |
|                                                                          | 188578072 | PXO_02148 | 16S rRNA-processing protein RimM                                              | *                                    |         |                            |
|                                                                          | 188578438 | PXO_02549 | glu-trnAgln amidotransferase a subunit                                        | *                                    |         |                            |
| K<br>(Transcription)                                                     | 188574628 | PXO_03849 | sal operon transcriptional repressor                                          | 0.31                                 | 0.005   |                            |
|                                                                          | 188575426 | PXO_04591 | oxidative stress transcriptional regulator                                    | *                                    |         |                            |
|                                                                          | 188577059 | PXO_01234 | ArsR family transcriptional regulator                                         | *                                    |         |                            |
|                                                                          | 188577334 | PXO_01665 | transcriptional regulator                                                     | *                                    |         |                            |
|                                                                          | 188578021 | PXO_01953 | HrpX/HrpB                                                                     | *                                    |         |                            |
| L<br>(Replication,<br>recombination<br>and repair)                       | 188577111 | PXO_01182 | recN DNA repair protein RecN                                                  | 0.46                                 | 0.008   |                            |
|                                                                          | 188578568 | PXO_02701 | cas crispr-associated helicase Cas3 domain protein                            | 0.31                                 | 0.000   |                            |
|                                                                          | 188578573 | PXO_02696 | cas crispr-associated protein Cas1                                            | 0.32                                 | 0.018   |                            |
|                                                                          | 188574426 | PXO_03333 | ATP-dependent RNA helicase                                                    | *                                    |         |                            |
|                                                                          | 188574575 | PXO_05437 | exodeoxyribonuclease V subunit gamma                                          | *                                    |         |                            |
|                                                                          | 188575308 | PXO_04356 | dgtp-pyrophosphohydrolase; thiamine phosphate synthase                        | *                                    |         |                            |
|                                                                          | 188575552 | PXO_04456 | -3-methyladenine glycosylase                                                  | *                                    |         |                            |
|                                                                          | 188576896 | PXO_06102 | putative transposase                                                          | *                                    |         |                            |
| M<br>(Cell<br>wall/membrane<br>/envelope<br>biogenesis)                  | 188574745 | PXO_03724 | pathogenicity protein                                                         | 0.40                                 | 0.033   |                            |
|                                                                          | 188575376 | PXO_04642 | organic solvent tolerance protein                                             | 0.43                                 | 0.000   |                            |
|                                                                          | 188575564 | PXO_04696 | imcF ImcF-related family                                                      | 0.48                                 | 0.010   |                            |
|                                                                          | 188576974 | PXO_06183 | O-antigen biosynthesis protein                                                | 0.05                                 | 0.014   |                            |
|                                                                          | 188577399 | PXO_01594 | glycosyltransferase                                                           | 0.29                                 | 0.011   |                            |
|                                                                          | 188574338 | PXO_03413 | XopF1 effector                                                                | *                                    |         |                            |
|                                                                          | 188575265 | PXO_04400 | hypothetical protein                                                          | *                                    |         |                            |
|                                                                          | 188575823 | PXO_00250 | SciS protein                                                                  | *                                    |         |                            |
|                                                                          | 188576508 | PXO_00587 | IpxK tetraacyldisaccharide 4'-kinase                                          | *                                    |         |                            |
|                                                                          | 188577579 | PXO_01403 | exopolysaccharide xanthan biosynthesis glycosyltransferase GumM               | *                                    |         |                            |
|                                                                          | 188577582 | PXO_01400 | exopolysaccharide xanthan biosynthesis protein GumJ                           | *                                    |         |                            |
|                                                                          | 188577583 | PXO_01399 | exopolysaccharide xanthan biosynthesis glycosyltransferase GumI               | *                                    |         |                            |
|                                                                          | 188577584 | PXO_01398 | exopolysaccharide xanthan biosynthesis glycosyltransferase GumH               | *                                    |         |                            |
|                                                                          | 188577589 | PXO_01394 | exopolysaccharide xanthan biosynthesis glycosyltransferase GumD               | *                                    |         |                            |
|                                                                          | 188577591 | PXO_01391 | exopolysaccharide xanthan biosynthesis export protein GumB                    | *                                    |         |                            |
|                                                                          | 188578508 | PXO_02622 | 3-deoxy-D-manno-octulosonic-acid transferase                                  | *                                    |         |                            |
| N<br>(Cell motility)                                                     | 188577157 | PXO_01137 | pili assembly chaperone                                                       | *                                    |         | U                          |
| O<br>(Post-<br>translational<br>modification,<br>protein<br>turnover and | 188575448 | PXO_04567 | domain of unknown function protein                                            | 0.20                                 | 0.015   |                            |
|                                                                          | 188576457 | PXO_00635 | peptidase S8 and S53, subtilisin, kexin, sedolisin                            | 0.17                                 | 0.038   |                            |
|                                                                          | 188577071 | PXO_01222 | ABC transporter vitamin B12 uptake permease                                   | 0.11                                 | 0.002   |                            |
|                                                                          | 188577953 | PXO_02027 | pirin                                                                         | 0.42                                 | 0.008   |                            |

|                                                                      |           |           |                                                                                        |      |       |  |
|----------------------------------------------------------------------|-----------|-----------|----------------------------------------------------------------------------------------|------|-------|--|
| transport, and chaperones)                                           | 188578601 | PXO_02667 | disulfide isomerase                                                                    | *    |       |  |
| P<br>(Inorganic ion transport and metabolism)                        | 188574287 | PXO_03467 | TonB-dependent outer membrane Receptor                                                 | 0.20 | 0.001 |  |
|                                                                      | 188574650 | PXO_03827 | TonB-dependent receptor                                                                | 0.31 | 0.000 |  |
|                                                                      | 188574892 | PXO_04013 | bfr bacterioferritin                                                                   | 0.34 | 0.036 |  |
|                                                                      | 188575259 | PXO_04406 | TonB-dependent outer membrane Receptor                                                 | 0.30 | 0.001 |  |
|                                                                      | 188578215 | PXO_02318 | modA molybdate ABC transporter, periplasmic molybdate-binding protein                  | 0.36 | 0.020 |  |
|                                                                      | 188578387 | PXO_02495 | ppk polyphosphate kinase                                                               | 0.31 | 0.001 |  |
|                                                                      | 188578540 | PXO_02728 | TonB-dependent outer membrane receptor                                                 | 0.31 | 0.016 |  |
|                                                                      | 188578988 | PXO_02830 | catalase                                                                               | 0.46 | 0.000 |  |
|                                                                      | 188579012 | PXO_02805 | TonB-dependent receptor                                                                | 0.39 | 0.000 |  |
|                                                                      | 188576115 | PXO_00453 | magnesium and cobalt transport protein                                                 | *    |       |  |
| Q<br>(Secondary metabolites biosynthesis, transport, and catabolism) | 188575037 | PXO_04215 | hmgA homogentisate 1,2-dioxygenase                                                     | 0.43 | 0.011 |  |
|                                                                      | 188574829 | PXO_03950 | AMP-ligase                                                                             | *    |       |  |
|                                                                      | 188577188 | PXO_01812 | hypothetical protein                                                                   | *    |       |  |
|                                                                      | 188577963 | PXO_02015 | dienelactone hydrolase                                                                 | *    |       |  |
|                                                                      | 188578635 | PXO_03182 | ABC transporter ATP-binding protein                                                    | *    |       |  |
| S<br>(Function unknown)                                              | 188575560 | PXO_04448 | hypothetical protein                                                                   | 0.18 | 0.006 |  |
|                                                                      | 188577462 | PXO_01531 | Rhs element Vgr protein                                                                | 0.45 | 0.010 |  |
|                                                                      | 188578584 | PXO_02685 | general secretion pathway protein N                                                    | 0.44 | 0.007 |  |
|                                                                      | 188574321 | PXO_03429 | putative secreted protein                                                              | *    |       |  |
|                                                                      | 188574341 | PXO_03410 | HrpD6                                                                                  | *    |       |  |
|                                                                      | 188574402 | PXO_03356 | hypothetical protein, XopW                                                             | *    |       |  |
|                                                                      | 188574484 | PXO_03644 | Rhs element Vgr protein                                                                | *    |       |  |
|                                                                      | 188574548 | PXO_03578 | ycel Ycel like family                                                                  | *    |       |  |
|                                                                      | 188574925 | PXO_04047 | hypothetical protein                                                                   | *    |       |  |
|                                                                      | 188575572 | PXO_05513 | Sulfatase modifying factor 1 -like protein (C-alpha-formylglycine-generating enzyme 1) | *    |       |  |
|                                                                      | 188576534 | PXO_00563 | helix-destabilizing protein                                                            | *    |       |  |
|                                                                      | 188577418 | PXO_01574 | hypothetical protein                                                                   | *    |       |  |
|                                                                      | 188577901 | PXO_02079 | hypothetical protein                                                                   | *    |       |  |
|                                                                      | 188577923 | PXO_02056 | hypothetical protein                                                                   | *    |       |  |
|                                                                      | 188577947 | PXO_02033 | hypothetical protein                                                                   | *    |       |  |
|                                                                      | 188577951 | PXO_02029 | Rhs element Vgr protein                                                                | *    |       |  |
|                                                                      | 188578244 | PXO_02349 | transposase                                                                            | *    |       |  |
|                                                                      | 188578350 | PXO_02458 | hypothetical protein                                                                   | *    |       |  |
|                                                                      | 188578351 | PXO_02459 | hypothetical protein                                                                   | *    |       |  |
|                                                                      | 188578431 | PXO_02542 | ISXo8 transposase                                                                      | *    |       |  |
|                                                                      | 188574363 | PXO_03390 | hypothetical protein                                                                   | 0.40 | 0.009 |  |
|                                                                      | 188574397 | PXO_03361 | VirK                                                                                   | 0.36 | 0.001 |  |
|                                                                      | 188574624 | PXO_03853 | sialic acid-specific 9-O-acetylsterase                                                 | 0.33 | 0.045 |  |
|                                                                      | 188575286 | PXO_04379 | LppC superfamily                                                                       | 0.31 | 0.001 |  |
|                                                                      | 188575394 | PXO_04623 | hypothetical protein                                                                   | 0.06 | 0.000 |  |
|                                                                      | 188575565 | PXO_04697 | hypothetical protein                                                                   | 0.42 | 0.002 |  |
|                                                                      | 188575567 | PXO_04699 | impA ImpA, N-terminal                                                                  | 0.34 | 0.049 |  |
|                                                                      | 188575570 | PXO_04702 | lipoprotein, putative                                                                  | 0.29 | 0.000 |  |
|                                                                      | 188575752 | PXO_04863 | hypothetical protein                                                                   | 0.22 | 0.031 |  |
|                                                                      | 188575758 | PXO_04857 | hypothetical protein                                                                   | 0.40 | 0.002 |  |
|                                                                      | 188576006 | PXO_00059 | beta-ketoadipate enol-lactone hydrolase                                                | 0.39 | 0.016 |  |
|                                                                      | 188576411 | PXO_00684 | alkaline phosphatase                                                                   | 0.40 | 0.002 |  |
|                                                                      | 188576618 | PXO_00916 | methyl-accepting chemotaxis protein                                                    | 0.48 | 0.040 |  |
|                                                                      | 188577066 | PXO_01227 | hypothetical protein                                                                   | 0.46 | 0.035 |  |
|                                                                      | 188577219 | PXO_01779 | dehydrogenase                                                                          | 0.36 | 0.048 |  |
|                                                                      | 188577580 | PXO_01402 | gumL exopolysaccharide xanthan biosynthesis pyruvyltransferase GumL                    | 0.17 | 0.000 |  |
|                                                                      | 188577930 | PXO_02049 | EvpF                                                                                   | 0.38 | 0.008 |  |
|                                                                      | 188577970 | PXO_02005 | rickettsia 17 kDa surface antigen family                                               | 0.48 | 0.048 |  |
|                                                                      | 188578139 | PXO_02202 | tryptophan halogenase                                                                  | 0.36 | 0.029 |  |
|                                                                      | 188579014 | PXO_02803 | pass1 domain protein                                                                   | 0.47 | 0.015 |  |
|                                                                      | 188579015 | PXO_02802 | tryptophan halogenase                                                                  | 0.47 | 0.008 |  |
|                                                                      | 188579056 | PXO_02760 | XopN effector                                                                          | 0.29 | 0.000 |  |
|                                                                      | 188579071 | PXO_02746 | polyvinylalcohol dehydrogenase                                                         | 0.23 | 0.010 |  |
|                                                                      | 188579212 | PXO_03539 | putative ATP-binding protein                                                           | 0.26 | 0.004 |  |
|                                                                      | 188579216 | PXO_03536 | hypothetical protein                                                                   | 0.48 | 0.004 |  |
|                                                                      | 188574334 | PXO_03417 | HrpF                                                                                   | *    |       |  |
|                                                                      | 188574337 | PXO_03414 | Hpa3                                                                                   | *    |       |  |
|                                                                      | 188574350 | PXO_03401 | type III secretion protein HrpB1/HrpK                                                  | *    |       |  |
|                                                                      | 188574581 | PXO_03901 | XopQ effector                                                                          | *    |       |  |
|                                                                      | 188574618 | PXO_03859 | hypothetical protein                                                                   | *    |       |  |
|                                                                      | 188575158 | PXO_04253 | Rhs element Vgr protein                                                                | *    |       |  |
|                                                                      | 188575324 | PXO_04340 | sulfotransferase                                                                       | *    |       |  |
|                                                                      | 188575334 | PXO_04687 | phosphoanhydride phosphohydrolase                                                      | *    |       |  |
|                                                                      | 188575393 | PXO_04624 | hypothetical protein                                                                   | *    |       |  |
|                                                                      | 188575458 | PXO_04555 | tRNA-processing ribonuclease BN                                                        | *    |       |  |
|                                                                      | 188575846 | PXO_00227 | pthXo1 TAL effector AvrBs3/PthA                                                        | *    |       |  |
|                                                                      | 188576022 | PXO_00043 | chemotaxis protein                                                                     | *    |       |  |
|                                                                      | 188576163 | PXO_00408 | GumN protein                                                                           | *    |       |  |
|                                                                      | 188576869 | PXO_06072 | hypothetical protein                                                                   | *    |       |  |
|                                                                      | 188576973 | PXO_06182 | fkbM methyltransferase, FkbM family protein                                            | *    |       |  |
|                                                                      | 188577156 | PXO_01138 | protein U                                                                              | *    |       |  |

|                                             |           |           |                                                                                                   |      |       |   |
|---------------------------------------------|-----------|-----------|---------------------------------------------------------------------------------------------------|------|-------|---|
|                                             | 188577370 | PXO_01625 | hypothetical protein, XopK                                                                        | *    |       |   |
|                                             | 188577374 | PXO_01620 | leucin rich protein, XopL                                                                         | *    |       |   |
|                                             | 188577650 | PXO_01334 | hypothetical protein                                                                              | *    |       |   |
|                                             | 188577707 | PXO_01277 | hypothetical protein                                                                              | *    |       |   |
|                                             | 188577726 | PXO_01258 | SCO1/SenC superfamily                                                                             | *    |       |   |
|                                             | 188577775 | PXO_01885 | outer membrane protein                                                                            | *    |       |   |
|                                             | 188578140 | PXO_02201 | pass1 domain-containing protein                                                                   | *    |       |   |
|                                             | 188578277 | PXO_02383 | hypothetical protein                                                                              | *    |       |   |
|                                             | 188578355 | PXO_02463 | hypothetical protein                                                                              | *    |       |   |
|                                             | 188578964 | PXO_02855 | metallo-beta-lactamase superfamily protein                                                        | *    |       |   |
|                                             | 188579013 | PXO_02804 | protein SapC protein                                                                              | *    |       |   |
| T<br>(Signal<br>transduction<br>mechanisms) | 188574844 | PXO_03965 | two-component system regulatory protein                                                           | 0.38 | 0.018 |   |
|                                             | 188574378 | PXO_03378 | signal protein with GGDEF domain                                                                  | *    |       |   |
|                                             | 188574792 | PXO_03912 | anti-sigma F factor antagonist                                                                    | *    |       |   |
|                                             | 188575701 | PXO_04836 | two-component system regulatory protein                                                           | *    |       |   |
|                                             | 188576990 | PXO_06199 | signal protein with GGDEF domain                                                                  | *    |       |   |
|                                             | 188578299 | PXO_02406 | two-component system sensor protein                                                               | *    |       |   |
|                                             | 188578360 | PXO_02467 | protein phosphatase                                                                               | *    |       |   |
| U<br>(Intracellular<br>trafficking)         | 188575475 | PXO_04537 | secE preprotein translocase subunit SecE                                                          | *    |       |   |
|                                             | 188578598 | PXO_02671 | xadA Xanthomonas adhesin-like protein A                                                           | *    |       | W |
| V<br>(Defense<br>mechanisms)                | 188574417 | PXO_03342 | ABC transporter ATP-binding protein                                                               | 0.28 | 0.002 |   |
|                                             | 188577915 | PXO_02064 | type I restriction enzyme EcoKI M protein                                                         | 0.46 | 0.027 |   |
|                                             | 188576236 | PXO_00334 | cydD ABC transporter, CydDC cysteine exporter (CydDC-E) family, permease/ATP-binding protein CydD | *    |       |   |
|                                             | 188576249 | PXO_00322 | RND superfamily protein                                                                           | *    |       |   |
|                                             | 188578532 | PXO_02735 | hypothetical protein                                                                              | *    |       |   |

\* indicates the protein is unique to the Xoo (EV)
