# Supplementary material for: Elucidating Functions of FleQ in Xanthomonas oryzae pv. oryzae by Comparative Proteomic and Phenotypic Analyses
Source: MDPI journal article supplement (doi:10.3390/ijms19103038), 2018-10-05
Supplement: s1 [file s1]

**Table S1. Numbers of proteins and PSM (peptide spectral matches) detected in three biological replicates of *Xoo*(EV) and *Xoo*(FleQ) from LC-MS/MS.**

| Strains           | 1st     |       | 2nd     |       | 3rd     |       | shared proteins in 3 biological replicates |
|-------------------|---------|-------|---------|-------|---------|-------|--------------------------------------------|
|                   | protein | PSM   | protein | PSM   | protein | PSM   |                                            |
| <i>Xoo</i> (EV)*  | 1407    | 80137 | 1442    | 79940 | 1416    | 80069 | 1291                                       |
| <i>Xoo</i> (FleQ) | 1405    | 77960 | 1447    | 78010 | 1367    | 78154 | 1244                                       |

\*Identified proteins and PSMs from *Xoo*(EV) were used in a study published recently [33].
