# Supplementary material for: Elucidating Functions of FleQ in Xanthomonas oryzae pv. oryzae by Comparative Proteomic and Phenotypic Analyses
Source: MDPI journal article supplement (doi:10.3390/ijms19103038), 2018-10-05
Supplement: s1 [file s1]

**Table S4. Classification of more abundant (>2 fold) protein in Xoo (FleQ) using clusters of orthologous groups from the comparison between Xoo (EV) and Xoo (FleQ)**

| COG function                                                                          | Accession | locus tag | predicted function                                    | fold change<br>[Xoo(FleQ)/<br>Xoo(EV)] | P-value | included in<br>other group |
|---------------------------------------------------------------------------------------|-----------|-----------|-------------------------------------------------------|----------------------------------------|---------|----------------------------|
| C<br>(Energy<br>production and<br>conversion)                                         | 188577235 | PXO_01763 | GTN Reductase                                         | 2.48                                   | 0.00019 |                            |
|                                                                                       | 188577683 | PXO_01300 | NADH-ubiquinone oxidoreductase Nqo14 subunit          | *                                      |         |                            |
|                                                                                       | 188577689 | PXO_01294 | NADH-ubiquinone oxidoreductase chain 1                | *                                      |         |                            |
|                                                                                       | 188577723 | PXO_01261 | glyoxylate reductase                                  | *                                      |         |                            |
| E<br>(Amino acid<br>transport and<br>metabolism)                                      | 188576221 | PXO_00350 | acetylornithine deacetylase                           | 4.32                                   | 0.00380 |                            |
|                                                                                       | 188576366 | PXO_00728 | hutG N-formylglutamate amidohydrolase                 | 2.27                                   | 0.04312 |                            |
|                                                                                       | 188576575 | PXO_00815 | homoserine kinase                                     | 4.06                                   | 0.02208 |                            |
|                                                                                       | 188577148 | PXO_01146 | asnB asparagine synthase (glutamine-hydrolyzing)      | 2.94                                   | 0.01004 |                            |
| F<br>(Nucleotide<br>metabolism and<br>transport)                                      | 188576584 | PXO_00808 | pyrD dihydroorotate oxidase                           | *                                      |         |                            |
|                                                                                       | 188577983 | PXO_01992 | hypothetical protein                                  | *                                      |         |                            |
|                                                                                       | 188578897 | PXO_02921 | deoxyuridine 5'-triphosphate nucleotidohydrolase      | *                                      |         |                            |
| G<br>(Carbohydrate<br>transport and<br>metabolism)                                    | 188574991 | PXO_04111 | dehydrogenase                                         | *                                      |         |                            |
|                                                                                       | 188575395 | PXO_04622 | gluconolactonase                                      | *                                      |         |                            |
|                                                                                       | 188576074 | PXO_00488 | 1-phosphofructokinase                                 | *                                      |         |                            |
|                                                                                       | 188576653 | PXO_00880 | sugar ABC transporter substrate-binding protein       | *                                      |         |                            |
|                                                                                       | 188577064 | PXO_01229 | glucose-galactose transporter                         | *                                      |         |                            |
|                                                                                       | 188577803 | PXO_01859 | glycogen debranching protein GlgX                     | *                                      |         |                            |
|                                                                                       | 188578121 | PXO_02220 | phosphotransferase system HPr enzyme                  | *                                      |         |                            |
| H<br>(Coenzyme<br>transport and<br>metabolism)                                        | 188576405 | PXO_00690 | panB 3-methyl-2-oxobutanoate hydroxymethyltransferase | 2.62                                   | 0.00420 |                            |
|                                                                                       | 188578488 | PXO_02603 | thiC thiamine biosynthesis protein ThiC               | 4.06                                   | 0.04374 |                            |
|                                                                                       | 188575466 | PXO_04547 | hemA glutamyl-tRNA reductase                          | *                                      |         |                            |
|                                                                                       | 188576886 | PXO_06090 | molybdopterin biosynthesis protein MoeB               | *                                      |         |                            |
| I<br>(Lipid<br>metabolism)                                                            | 188577058 | PXO_01235 | acyl-CoA dehydrogenase, short-chain specific          | 2.64                                   | 0.02269 |                            |
|                                                                                       | 188574498 | PXO_03629 | oxidoreductase                                        | *                                      |         |                            |
|                                                                                       | 188574551 | PXO_03575 | acetyltransferase                                     | *                                      |         |                            |
|                                                                                       | 188577167 | PXO_01127 | undecaprenyl pyrophosphate synthase                   | *                                      |         |                            |
| J<br>(Translation)                                                                    | 188576927 | PXO_06136 | infA translation initiation factor IF-1               | 2.82                                   | 0.03306 |                            |
|                                                                                       | 188575503 | PXO_04508 | 30S ribosomal protein S14                             | *                                      |         |                            |
|                                                                                       | 188576349 | PXO_00745 | 30S ribosomal protein S18                             | *                                      |         |                            |
|                                                                                       | 188579180 | PXO_03239 | 50S ribosomal protein L33                             | *                                      |         |                            |
| K<br>(Transcription)                                                                  | 188576964 | PXO_06173 | FleQ                                                  | 55.73                                  | 0.00000 |                            |
|                                                                                       | 188577025 | PXO_06237 | transcriptional regulator                             | 2.06                                   | 0.00772 |                            |
|                                                                                       | 188575636 | PXO_04819 | Fur family transcriptional regulator                  | *                                      |         |                            |
| L<br>(Replication,<br>recombination<br>and repair)                                    | 188574271 | PXO_03483 | dnaA chromosomal replication initiator protein DnaA   | 2.82                                   | 0.03046 |                            |
|                                                                                       | 188574693 | PXO_03776 | deoxyribonuclease TatD                                | *                                      |         |                            |
|                                                                                       | 188576332 | PXO_00762 | exonuclease I                                         | *                                      |         |                            |
|                                                                                       | 188576930 | PXO_06139 | 7 and 8-dihydro-8-oxoguanine-triphosphatase           | *                                      |         |                            |
|                                                                                       | 188577602 | PXO_01379 | hypothetical protein                                  | *                                      |         |                            |
|                                                                                       | 188577870 | PXO_02112 | isrso5-transposase                                    | *                                      |         |                            |
| M<br>(Cell<br>wall/membrane/<br>envelope<br>biogenesis)                               | 188577138 | PXO_01155 | outer membrane efflux protein                         | 2.45                                   | 0.00692 |                            |
|                                                                                       | 188578233 | PXO_02338 | ErfK/YbiS/YcfS/YnhG                                   | 2.76                                   | 0.01417 |                            |
|                                                                                       | 188574945 | PXO_04067 | lipid A biosynthesis lauroyl acyltransferase          | *                                      |         |                            |
|                                                                                       | 188575702 | PXO_04837 | outer membrane channel protein                        | *                                      |         |                            |
|                                                                                       | 188577965 | PXO_02013 | UDP-N-acetylmuramoyl-L-alanyl-D-glutamate synthetase  | *                                      |         |                            |
|                                                                                       | 188578344 | PXO_02452 | heptosyl transferase                                  | *                                      |         |                            |
| N<br>(Cell motility)                                                                  | 188576955 | PXO_06164 | flagellar hook-associated protein FlgL                | *                                      |         |                            |
|                                                                                       | 188576981 | PXO_06190 | flagellar protein                                     | *                                      |         |                            |
| O<br>(Post-<br>translational<br>modification,<br>protein turnover,<br>and chaperones) | 188577996 | PXO_01979 | sufB FeS assembly protein SufB                        | 2.33                                   | 0.02183 |                            |
|                                                                                       | 188576437 | PXO_00658 | glutathione peroxidase                                | *                                      |         |                            |
|                                                                                       | 188577998 | PXO_01977 | FeS assembly protein SufD                             | *                                      |         |                            |
| P<br>(Inorganic ion<br>transport and<br>metabolism)                                   | 188577853 | PXO_02129 | TonB-dependent receptor                               | 2.47                                   | 0.01730 |                            |
|                                                                                       | 188575279 | PXO_04386 | potassium-transporting ATPase subunit B               | *                                      |         |                            |
|                                                                                       | 188576272 | PXO_00303 | TonB-dependent outer membrane receptor                | *                                      |         |                            |
|                                                                                       | 188577531 | PXO_01457 | TonB-dependent outer membrane receptor                | *                                      |         |                            |
|                                                                                       | 188578151 | PXO_02186 | voltage-gated ion channel superfamily protein         | *                                      |         |                            |
|                                                                                       | 188578406 | PXO_02512 | TonB-dependent receptor                               | *                                      |         |                            |
| Q<br>(Secondary<br>metabolites<br>biosynthesis,<br>transport, and<br>catabolism)      | 188579087 | PXO_03209 | toluene tolerance protein                             | 2.04                                   | 0.01182 |                            |
|                                                                                       | 188578910 | PXO_02909 | 3-oxoadipate enol-lactonase                           | *                                      |         |                            |
|                                                                                       | 188575364 | PXO_04653 | lemA LemA family protein                              | 2.86                                   | 0.01712 |                            |
|                                                                                       | 188576204 | PXO_00366 | general stress protein                                | 3.01                                   | 0.02667 |                            |
|                                                                                       | 188576230 | PXO_00338 | alpha-amino acid ester hydrolase                      | 2.50                                   | 0.00727 |                            |
|                                                                                       | 188574318 | PXO_03432 | ISXoo2 transposase                                    | 2.04                                   | 0.04766 |                            |
|                                                                                       | 188575255 | PXO_04411 | hypothetical protein                                  | 2.21                                   | 0.04065 |                            |
|                                                                                       | 188574393 | PXO_03365 | ISXo8 transposase                                     | *                                      |         |                            |
|                                                                                       | 188574582 | PXO_03899 | lipoprotein                                           | *                                      |         |                            |

|                                                                      |           |           |                                                    |      |         |  |
|----------------------------------------------------------------------|-----------|-----------|----------------------------------------------------|------|---------|--|
| S<br>(Function unknown)                                              | 188574607 | PXO_03873 | hypothetical protein                               | *    |         |  |
|                                                                      | 188575575 | PXO_04718 | lipoprotein                                        | *    |         |  |
|                                                                      | 188576458 | PXO_00634 | ISXoo8 transposase                                 | *    |         |  |
|                                                                      | 188577119 | PXO_01174 | lipoprotein                                        | *    |         |  |
|                                                                      | 188577493 | PXO_01501 | ISXoo6 transposase                                 | *    |         |  |
|                                                                      | 188577949 | PXO_02031 | hypothetical protein                               | *    |         |  |
|                                                                      | 188578567 | PXO_02702 | ISXo5 transposase                                  | *    |         |  |
|                                                                      | 188579089 | PXO_03207 | hypothetical protein                               | *    |         |  |
|                                                                      | 188579095 | PXO_03202 | ISXo2 transposase                                  | *    |         |  |
|                                                                      | 188576372 | PXO_00722 | poly(hydroxyalcanoate) granule associated protein  | 5.42 | 0.04223 |  |
|                                                                      | 188577530 | PXO_01458 | hypothetical protein                               | 3.59 | 0.00790 |  |
|                                                                      | 188577987 | PXO_01988 | bacterial DNA-binding protein                      | 2.86 | 0.00302 |  |
|                                                                      | 188579206 | PXO_03545 | hypothetical protein                               | 4.11 | 0.00298 |  |
|                                                                      | 188574374 | PXO_03381 | ABC transporter substrate binding protein          | *    |         |  |
|                                                                      | 188574439 | PXO_03320 | hypothetical protein                               | *    |         |  |
|                                                                      | 188574515 | PXO_03613 | tryptophan halogenase                              | *    |         |  |
|                                                                      | 188574837 | PXO_03958 | lipoprotein                                        | *    |         |  |
|                                                                      | 188574881 | PXO_04002 | nitrilotriacetate monooxygenase component B        | *    |         |  |
|                                                                      | 188574928 | PXO_04050 | RDD family protein                                 | *    |         |  |
|                                                                      | 188574941 | PXO_04063 | membrane flanked domain family                     | *    |         |  |
|                                                                      | 188575569 | PXO_04701 | DNA repair ATPase                                  | *    |         |  |
|                                                                      | 188576461 | PXO_00631 | cointegrate resolution protein T                   | *    |         |  |
|                                                                      | 188576621 | PXO_00911 | inner membrane protein YeiH                        | *    |         |  |
|                                                                      | 188576933 | PXO_06142 | chemotaxis protein                                 | *    |         |  |
|                                                                      | 188577429 | PXO_01563 | protein TolA                                       | *    |         |  |
|                                                                      | 188577941 | PXO_02039 | EF hand domain-containing protein                  | *    |         |  |
|                                                                      | 188578105 | PXO_02236 | hypothetical protein                               | *    |         |  |
|                                                                      | 188578381 | PXO_02489 | carboxymuconolactone decarboxylase                 | *    |         |  |
|                                                                      | 188578512 | PXO_02626 | hypothetical protein                               | *    |         |  |
|                                                                      | 188579028 | PXO_02789 | hypothetical protein                               | *    |         |  |
|                                                                      | 188579254 | PXO_03489 | tRNA modification GTPase TrmE                      | *    |         |  |
| T<br>(Signal transduction mechanisms)                                | 188575610 | PXO_04751 | chemotaxis protein                                 | *    |         |  |
|                                                                      | 188575915 | PXO_00155 | RNA chaperone Hfq                                  | *    |         |  |
|                                                                      | 188576596 | PXO_00798 | two-component system sensor protein                | *    |         |  |
|                                                                      | 188577309 | PXO_01691 | histidine kinase/response regulator hybrid protein | *    |         |  |
|                                                                      | 188577310 | PXO_01690 | histidine kinase-response regulator hybrid protein | *    |         |  |
| U<br>(Intracellular trafficking, secretion, and vesicular transport) | 188576290 | PXO_00521 | secF protein-export membrane protein SecF          | 3.13 | 0.00098 |  |
| V<br>(Defense mechanisms)                                            | 188577137 | PXO_01156 | multidrug resistance efflux pump                   | 4.26 | 0.00037 |  |
|                                                                      | 188575881 | PXO_00189 | ABC transporter ATP-binding protein                | *    |         |  |

\* indicates the protein is unique to the Xoo(FleQ)
