# Supplementary material for: Elucidating Functions of FleQ in Xanthomonas oryzae pv. oryzae by Comparative Proteomic and Phenotypic Analyses
Source: MDPI journal article supplement (doi:10.3390/ijms19103038), 2018-10-05
Supplement: s1 [file s1]

**Table S6. Classification of more abundant (>2 fold) protein in *XooΔfleQ* using clusters of orthologous groups from the comparison between *XooΔfleQ* and *Xoo***

| COG function                                            | Accession | locus tag | Predicted function                                           | fold change<br>( <i>XooΔfleQ</i> / <i>Xoo</i> ) | P-value | included in<br>other group |
|---------------------------------------------------------|-----------|-----------|--------------------------------------------------------------|-------------------------------------------------|---------|----------------------------|
| E<br>(Amino acid<br>transport and<br>metabolism)        | 188575980 | PXO_00090 | dapB dihydrodipicolinate reductase                           | 2.16                                            | 0.003   |                            |
|                                                         | 188576562 | PXO_00834 | hisC histidinol-phosphate aminotransferase                   | 4.16                                            | 0.046   |                            |
|                                                         | 188574879 | PXO_04000 | anthranilate synthase component II                           | *                                               |         |                            |
|                                                         | 188576564 | PXO_00832 | hisG ATP phosphoribosyltransferase                           | *                                               |         |                            |
|                                                         | 188578409 | PXO_02515 | cysA sulfate/thiosulfate import ATP-binding protein CysA     | *                                               |         |                            |
| F<br>(Nucleotide)                                       | 188576119 | PXO_00449 | hypothetical protein                                         | 2.14                                            | 0.009   |                            |
| G<br>(Carbohydrate<br>transport and<br>metabolism)      | 188574609 | PXO_03869 | beta-xylosidase (1,4-beta-D-xylan xylohydrolase)             | *                                               |         |                            |
|                                                         | 188576327 | PXO_00767 | NAD(+) kinase                                                | *                                               |         |                            |
|                                                         | 188578046 | PXO_01925 | alpha-ribazole-5""-phosphate phosphatase                     | *                                               |         |                            |
|                                                         | 188578551 | PXO_02718 | prpB methylisocitrate lyase                                  | *                                               |         |                            |
|                                                         | 188578931 | PXO_02887 | glycosyl hydrolase, family 15                                | *                                               |         |                            |
| H<br>(Coenzyme<br>transport and<br>metabolism)          | 188576261 | PXO_00311 | coaD pantetheine-phosphate adenylyltransferase               | 2.23                                            | 0.040   |                            |
|                                                         | 188575370 | PXO_04648 | folA dihydrofolate reductase                                 | *                                               |         |                            |
|                                                         | 188577106 | PXO_01187 | pyridoxal kinase                                             | *                                               |         |                            |
|                                                         | 188578400 | PXO_02507 | folypolyglutamate synthase; dihydrofolate synthase           | *                                               |         |                            |
| I<br>(Lipid)                                            | 188575057 | PXO_04196 | hypothetical protein                                         | *                                               |         |                            |
| J<br>(Translation)                                      | 188576349 | PXO_00745 | rpsR ribosomal protein S18                                   | *                                               |         |                            |
|                                                         | 188579051 | PXO_02765 | peptidyl-tRNA hydrolase domain, putative                     | *                                               |         |                            |
| L<br>(Replication)                                      | 188577280 | PXO_01719 | recO DNA repair protein RecO                                 | *                                               |         |                            |
| M<br>(Cell<br>wall/membrane/e<br>nvelope<br>biogenesis) | 188575292 | PXO_04372 | ftsI peptidoglycan synthetase FtsI                           | *                                               |         |                            |
|                                                         | 188575715 | PXO_04849 | RhsD protein                                                 | *                                               |         |                            |
|                                                         | 188577176 | PXO_01116 | lpxB lipid-A-disaccharide synthase                           | *                                               |         |                            |
|                                                         | 188577398 | PXO_01595 | mrcB penicillin-binding protein 1B                           | *                                               |         |                            |
|                                                         | 188577965 | PXO_02013 | murD UDP-N-acetylmuramoylalanine--D-glutamate ligase         | *                                               |         |                            |
|                                                         | 188578233 | PXO_02338 | Erk/YbiS/YcfS/YnhG                                           | *                                               |         |                            |
| O<br>(Post-<br>translational)                           | 188574496 | PXO_03631 | aspartyl-asparaginyl beta-hydroxylase                        | *                                               |         |                            |
|                                                         | 188577953 | PXO_02027 | pirin                                                        | *                                               |         |                            |
| P<br>(Inorganic ion<br>transport and<br>metabolism)     | 188574611 | PXO_03867 | TonB-dependent receptor                                      | 7.07                                            | 0.002   |                            |
|                                                         | 188578143 | PXO_02198 | TonB-dependent receptor                                      | 5.53                                            | 0.003   |                            |
|                                                         | 188578988 | PXO_02830 | catalase                                                     | 2.57                                            | 0.015   |                            |
|                                                         | 188575668 | PXO_04790 | TonB-dependent receptor                                      | *                                               |         |                            |
|                                                         | 188578652 | PXO_03166 | wzt ABC transporter, ATP binding protein                     | *                                               |         |                            |
|                                                         | 188579175 | PXO_03244 | alkaline phosphatase D                                       | *                                               |         |                            |
| Q<br>(Secondary)                                        | 188577188 | PXO_01812 | hypothetical protein                                         | *                                               |         |                            |
| S<br>(Function<br>unknown)                              | 188574360 | PXO_03392 | Hpa1                                                         | *                                               |         |                            |
|                                                         | 188575575 | PXO_04718 | lipoprotein, putative                                        | *                                               |         |                            |
|                                                         | 188575717 | PXO_04851 | ISXo8 transposase                                            | *                                               |         |                            |
|                                                         | 188576065 | PXO_00498 | hypothetical protein                                         | *                                               |         |                            |
|                                                         | 188576202 | PXO_00368 | ISXo1 transposase                                            | *                                               |         |                            |
|                                                         | 188576892 | PXO_06098 | hypothetical protein                                         | *                                               |         |                            |
|                                                         | 188577949 | PXO_02031 | hypothetical protein                                         | *                                               |         |                            |
|                                                         | 188578659 | PXO_05753 | hypothetical protein                                         | *                                               |         |                            |
|                                                         | 188578677 | PXO_03144 | hypothetical protein                                         | *                                               |         |                            |
|                                                         | 188579032 | PXO_02785 | putative ISXoo14 transposase                                 | *                                               |         |                            |
|                                                         | 188575393 | PXO_04624 | hypothetical protein                                         | *                                               |         |                            |
|                                                         | 188577368 | PXO_01628 | hypothetical protein                                         | *                                               |         |                            |
|                                                         | 188577420 | PXO_01572 | ExsB protein                                                 | *                                               |         |                            |
|                                                         | 188577614 | PXO_01368 | hypothetical protein                                         | *                                               |         |                            |
|                                                         | 188577940 | PXO_02040 | Rhs element Vgr protein                                      | *                                               |         |                            |
|                                                         | 188578140 | PXO_02201 | pass1 domain protein                                         | *                                               |         |                            |
|                                                         | 188578637 | PXO_03180 | lipoprotein, putative                                        | *                                               |         |                            |
|                                                         | 188578774 | PXO_03046 | 4,5-dopa dioxygenase extradiol                               | *                                               |         |                            |
| T<br>(Signal<br>transduction<br>mechanisms)             | 188576961 | PXO_06170 | response regulator                                           | *                                               |         |                            |
| U<br>(Intracellular<br>trafficking,                     | 188577662 | PXO_01322 | prepilin-type N-terminal cleavage/methylation domain protein | *                                               |         |                            |
|                                                         | 188578598 | PXO_02671 | xadA Xanthomonas adhesin-like protein A                      | 3.02                                            | 0.001   | W                          |
| V<br>(Defense<br>mechanisms)                            | 188577910 | PXO_02070 | type I restriction enzyme EcoAI R protein                    | *                                               |         |                            |

\* indicates the protein is unique to the *XooΔfleQ*
