# Supplementary material for: Elucidating Functions of FleQ in Xanthomonas oryzae pv. oryzae by Comparative Proteomic and Phenotypic Analyses
Source: MDPI journal article supplement (doi:10.3390/ijms19103038), 2018-10-05
Supplement: s1 [file s1]

**Table S2. Numbers of proteins and PSM (peptide spectral matches) detected in three biological replicates of *Xoo* and *XooΔfleQ* from LC-MS/MS.**

| Strains         | 1st     |       | 2nd     |       | 3rd     |       | shared proteins in 3 biological replicates |
|-----------------|---------|-------|---------|-------|---------|-------|--------------------------------------------|
|                 | protein | PSM   | protein | PSM   | protein | PSM   |                                            |
| <i>Xoo</i> *    | 1584    | 39360 | 1702    | 39605 | 2642    | 31602 | 1227                                       |
| <i>XooΔfleQ</i> | 1796    | 29283 | 1799    | 29285 | 2090    | 29243 | 1161                                       |

\*Identified proteins and PSMs from *Xoo* were used in a study published recently [33].
