# Supplementary material for: Elucidating Functions of FleQ in Xanthomonas oryzae pv. oryzae by Comparative Proteomic and Phenotypic Analyses
Source: MDPI journal article supplement (doi:10.3390/ijms19103038), 2018-10-05
Supplement: s1 [file s1]

Table S7. Bacterial strains and plasmids used in this study

| Strains and plasmid                         | Characteristics                                                                                                                                                                                           | Source or reference  |
|---------------------------------------------|-----------------------------------------------------------------------------------------------------------------------------------------------------------------------------------------------------------|----------------------|
| <i>Escherichia coli</i>                     |                                                                                                                                                                                                           |                      |
| DH5α                                        | F <sup>-</sup> , $\lambda$ 80 <i>dlacZ</i> Δ <i>M15</i> , Δ( <i>lacZYA</i> -argF), U169, <i>deoR</i> , RecA1, <i>endA1</i> , <i>hsdR17</i> , <i>gyrA96</i> , <i>thit-1</i> , <i>relA1</i> , <i>supE44</i> | Promega              |
| <i>Xanthomonas oryzae</i> pv. <i>oryzae</i> |                                                                                                                                                                                                           |                      |
| PXO99a                                      | Wild type, Philippine race 6 strain; Cp <sup>r</sup>                                                                                                                                                      | Hopkins et al., 1992 |
| <i>Xoo</i> (EV)                             | Wild type strain carrying pBBR1-MCS5, Gm <sup>r</sup>                                                                                                                                                     | This study           |
| <i>Xoo</i> (FleQ)                           | Wild type strain carrying pBBR1FleQ, Gm <sup>r</sup>                                                                                                                                                      | This study           |
| <i>XooΔfleQ</i> (EV)                        | Insertional mutant in <i>fleQ</i> ( <i>PXO_00993</i> ) carrying pBBR1-MCS5, Km <sup>r</sup> , Gm <sup>r</sup>                                                                                             | This study           |
| <i>XooΔfleQ</i> (FleQ)                      | <i>XooΔfleQ</i> complemented with pBBR1FleQ, Km <sup>r</sup> , Gm <sup>r</sup>                                                                                                                            | This study           |
| Plasmid                                     |                                                                                                                                                                                                           |                      |
| pGem-T-easy                                 | TA cloning vector, Am <sup>r</sup>                                                                                                                                                                        | Promega              |
| pGem-fleQ                                   | pGEM-T easy inserted by 1603-bp <i>fleQ</i> fragment by TA ligation, Am <sup>r</sup>                                                                                                                      | This study           |
| pUC4K                                       | Vector carrying kanamycin cassette, Km <sup>r</sup>                                                                                                                                                       | Pharmacia            |
| pGem-fleQ::km                               | A derivative of pGEM-fleQ. <i>fleQ</i> gene disrupted by kanamycine cassette, Am <sup>r</sup> , Km <sup>r</sup>                                                                                           | This study           |
| pBBR1-MCS5                                  | Broad-host-range vector, lac promoter, Gm <sup>r</sup>                                                                                                                                                    | Kovach et al., 1995  |
| pGemFleQ-OE                                 | pGEM-T easy carrying a 1619-bp FleQ fragment containing 6xHis-tag at N-terminus at backward primer by TA ligation, Am <sup>r</sup>                                                                        | This study           |
| pBBR1FleQ                                   | pBBR1-MCS5 carrying a 1619-bp with 6xHis-tag at N-terminus from pGemFleQ-OE, Gm <sup>r</sup>                                                                                                              | This study           |

Cp<sup>r</sup>, Am<sup>r</sup>, Km<sup>r</sup> and Gm<sup>r</sup> represent resistance to cephalixin, ampicillin, kanamycin and gentamycin.
