# Supplementary material for: Elucidating Functions of FleQ in Xanthomonas oryzae pv. oryzae by Comparative Proteomic and Phenotypic Analyses
Source: MDPI journal article supplement (doi:10.3390/ijms19103038), 2018-10-05
Supplement: s1 [file s1]

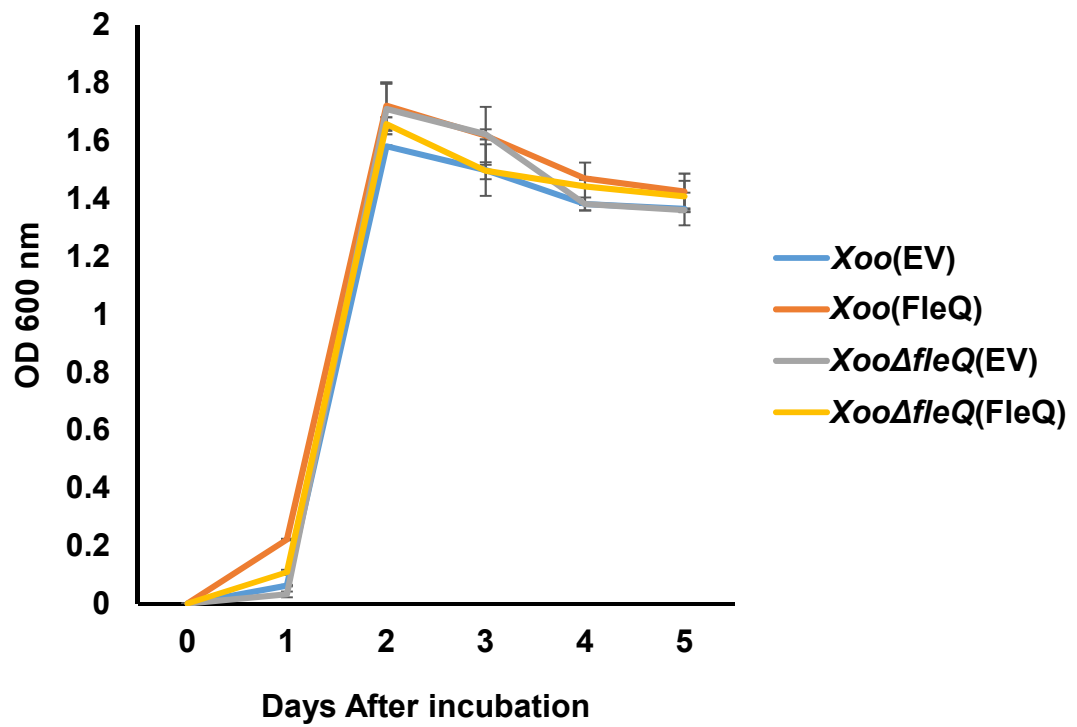

Figure S1. Growth of *Xoo*(EV), *Xoo*(FleQ), *XooΔfleQ*(EV) and *XooΔfleQ*(FleQ) in PSB media. *Xoo* strains were grown, adjusted OD<sub>600</sub> of 0.3, serially diluted ( $10^{-3}$ ), and grown in PSB media. Values of optical density (OD) at 600 nm were measured at 0, 1, 2, 3, 4, and 5 days after incubation. Data points indicate the means of three biological replicates with the standard deviations.
