# Supplementary material for: Elucidating Functions of FleQ in Xanthomonas oryzae pv. oryzae by Comparative Proteomic and Phenotypic Analyses
Source: Int J Mol Sci. 2018 Oct 5;19(10):3038. doi: 10.3390/ijms19103038 (PMC6213323; doi:10.3390/ijms19103038)
Supplement: Supplementary file 1 [file ijms-19-03038-s001.zip]

Archive with 8 entries (8 files):
- Figure S1.pdf
- Table S1_revised.pdf
- Table S2_revised.pdf
- Table S3_revised.pdf
- Table S4_revised.pdf
- Table S5_revised.pdf
- Table S6_revised.pdf
- Table S7_revised.pdf
